# Supplementary material
Source: MDPI journal article supplement (https://www.mdpi.com/2075-5309/11/8/339)
Supplement: s1 [file s1]

**Table S1: Supplementary data of Building materials and their density, flame test temperature, thermal conductivity, material failure time, rate of fire spread and condition of material after heating. The data below were obtained from laboratory experiments for different building materials and their rate of fire spread.**

| S/N o. | Building material description with density                                                                                                                             | Temperature (°C) in Flame test equipment compartment before material was entirely or partially consumed | Heat flux / Thermal Conductivity of Material W/(m <sup>2</sup> K) | Material failure time (in minutes) | Rate at fire spread via linear metre or m <sup>2</sup> of materials per minutes (metre sq. / minute) | Condition of building material after heating |
|--------|------------------------------------------------------------------------------------------------------------------------------------------------------------------------|---------------------------------------------------------------------------------------------------------|-------------------------------------------------------------------|------------------------------------|------------------------------------------------------------------------------------------------------|----------------------------------------------|
| 1      | <b>Brick/Block</b>                                                                                                                                                     |                                                                                                         |                                                                   |                                    |                                                                                                      |                                              |
| i      | Clay bricks (Density -1,700 kg/m <sup>2</sup> )                                                                                                                        | 500 - 600 °C                                                                                            | 0.528                                                             | Partial failure after              | 00:35:00                                                                                             | Material bond substantially weakened in area |
| ii     | sandcrete block - 2,300 kg/m <sup>3</sup>                                                                                                                              | 350 - 400 °C                                                                                            | 0.501                                                             | Partial failure after              | 00:47:00                                                                                             | Material bond substantially weakened in area |
| iii    | Concrete (Density - 2,000 kg/m <sup>2</sup> )                                                                                                                          | 500 - 600 °C                                                                                            | 0.710                                                             | Partial failure after              | 00:55:00                                                                                             | Material bond substantially weakened in area |
| 2      | <b>Insulation materials</b>                                                                                                                                            |                                                                                                         |                                                                   |                                    |                                                                                                      | Entirely consumed to ashes                   |
| i      | Celotex insulation (Density - 25 kg/m <sup>2</sup> )                                                                                                                   | 100 - 150 °C                                                                                            | 0.211                                                             | 3 minutes                          | 00:15:13                                                                                             | Entirely consumed to ashes                   |
| ii     | Fiberglass insulation (Density - kg/m <sup>2</sup> )                                                                                                                   | 350 - 400 °C                                                                                            | 0.412                                                             | 17 minutes                         | 00:25:04                                                                                             | Partially consumed; Melts and Drop formation |
| iii    | Polyurethane Foam (Density - 52 kg/m <sup>2</sup> )                                                                                                                    | 100 - 150 °C                                                                                            | 0.222                                                             | 5 minutes                          | 00:04:05                                                                                             | Entirely consumed to ashes                   |
| iv     | Polystyrene Insulation (Density - 1060 kg/m <sup>3</sup> )                                                                                                             | 100 - 150 °C                                                                                            | 0.298                                                             | 7 minutes                          | 00:02:08                                                                                             | Melts, and consumed to ashes                 |
| 3      | <b>Long span Aluminium cladding</b>                                                                                                                                    |                                                                                                         |                                                                   |                                    |                                                                                                      |                                              |
| i      | Reynobond PE ACM cladding coil-coated aluminium sheets fusion bonded to both sides of a polyethylene core (Density - 10 kg/m <sup>2</sup> up to 35 kg/m <sup>2</sup> ) | 100 - 200 °C                                                                                            | 0                                                                 | 13 Minutes                         | 00:09:10                                                                                             | Soften, Melts and Drop formation             |
| ii     | Reynolux aluminium sheets (Density = 2,750 kg/m <sup>2</sup> )                                                                                                         | 350 - 400 °C                                                                                            |                                                                   | 24 Minutes                         | 00:10:08                                                                                             | Soften, Melts and Drop formation             |
| iii    | Aluminum (2,739 kg/m <sup>3</sup> )                                                                                                                                    | 350 - 400 °C                                                                                            | 235                                                               | 31 Minutes                         | 00:35:10                                                                                             | Soften, Melts and Drop formation             |
| 4      | <b>Wall and floor tiles</b>                                                                                                                                            |                                                                                                         |                                                                   |                                    |                                                                                                      |                                              |
| i      | Polymer-Sand Tiles PE-158 (Density                                                                                                                                     | 350 - 400 °C                                                                                            | 1.455                                                             | 28 Minutes                         | 00:17:12                                                                                             | Partially consumed                           |
| ii     | Ceramic tiles (2790 - 3070 kg / m <sup>3</sup> )                                                                                                                       | 350 - 400 °C                                                                                            | 1.782                                                             | 41 Minutes                         | 00:25:10                                                                                             | Partially consumed                           |
| iii    | 1/2 inch Plywood (6.93 kg/m <sup>2</sup> )                                                                                                                             | 100 - 200 °C                                                                                            | 1.802                                                             | 9 Minutes                          | 00:07:03                                                                                             | Entirely consumed to ashes                   |
| 5      | <b>Other materials</b>                                                                                                                                                 |                                                                                                         |                                                                   |                                    |                                                                                                      |                                              |
| i      | Wooden skirting (Density - 900 kg/m <sup>2</sup> )                                                                                                                     | 100 - 150 °C                                                                                            | 1.452                                                             | 11 Minutes                         | 00:10:00                                                                                             | Entirely consumed to ashes                   |
| ii     | Plastic trunking (Density - 930 kg/m <sup>2</sup> )                                                                                                                    | 100 - 150 °C                                                                                            | 0.411                                                             | 3 minutes                          | 00:04:17                                                                                             | Melts; completely deformed                   |
| iii    | Wooden doors (Density - 420 kg/m <sup>2</sup> )                                                                                                                        | 100 - 150 °C                                                                                            | 1.651                                                             | 11 Minutes                         | 00:12:18                                                                                             | Entirely consumed to ashes                   |
| iv     | Plastic door (Density - 970 kg/m <sup>2</sup> )                                                                                                                        | 100 - 150 °C                                                                                            | 0.621                                                             | 9 Minutes                          | 00:10:19                                                                                             | Entirely consumed to ashes                   |
| v      | Glass window (Density - 2579 kg/m <sup>2</sup> )                                                                                                                       | 350 - 400 °C                                                                                            | 1.722                                                             | 23 Minutes                         | 00:11:02                                                                                             | Shattered into pieces                        |
| vi     | Framing Steel (7,849 kg/m <sup>3</sup> )                                                                                                                               | 100 - 150 °C                                                                                            |                                                                   | No Failure after 45                | 00:39:21                                                                                             | No visible changes to material               |
