# Supplementary material
Source: MDPI journal article supplement (https://www.mdpi.com/2075-5309/11/8/339)
Supplement: s1 [file s1]

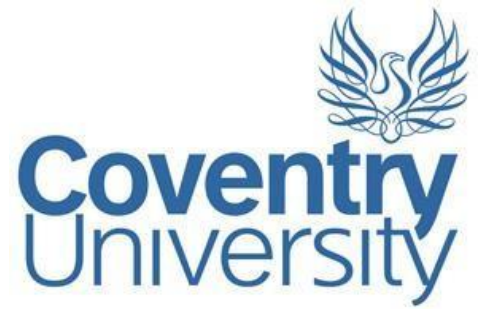

## **Certificate of Ethical Approval**

Applicant:

Chizaram Nwankwo

Project Title:

**Fire Safety in High-Rise Buildings: Is the Stay-Put Tactic a Misjudgement or Magnificent Strategy?**

This is to certify that the above named applicant has completed the Coventry University Ethical Approval process and their project has been confirmed and approved as Medium Risk

Date of approval:

05 February 2019

Project Reference Number:

P64554
